# Supplementary material for: Effect of Algae Supplementation on the Gene Expression of Liver Lipid Metabolism in Dairy Goat Bucks
Source: MDPI journal article supplement (doi:10.3390/agriculture14050685), 2024-04-27
Supplement: s1 [file s1]

**Table S1.** Primer pairs for RT-qPCR analysis.

| Gene           | Primers <sup>1</sup> | Sequence (5' to 3')     | NCBI accession number | bp <sup>2</sup> |
|----------------|----------------------|-------------------------|-----------------------|-----------------|
| <i>SCD</i>     | F.501                | TGCTGATCCCCACAATTCCC    | NM_001285619.1        | 216             |
|                | R.716                | CCCCATAGATACCACGGCAC    |                       |                 |
| <i>LDLR</i>    | F.2403               | ACAATGTCCCAACAAGCCCT    | XM_005682375.3        | 189             |
|                | R.2591               | GTACACGGGGTTGTCTGAAGT   |                       |                 |
| <i>FASN</i>    | F.6850               | GGGCTCCACCACCGTGTTC     | NM_001285629.1        | 226             |
|                | R.7075               | GCTCTGCTGGGCCTGCAGCTG   |                       |                 |
| <i>FADS1</i>   | F.186                | CGCTATTTACCTGGGACGA     | XM_018043053.1        | 187             |
|                | R.372                | CCTTGTTGATGTGGAACGCC    |                       |                 |
| <i>INSIG1</i>  | F.323                | TGCAGGTCCAGAGGAATGTC    | NM_001286088.1        | 169             |
|                | R.491                | CACTCCCGCTTGAACCTGTG    |                       |                 |
| <i>FADS2</i>   | F.237                | CCGCTGGGAGGAGATTC       | XM_018043056.1        | 129             |
|                | R.365                | GCGTAGTGCCCGATGAC       |                       |                 |
| <i>HMGCR</i>   | F.2075               | CGCAACCTTTACATCCG       | XM_018053703.1        | 190             |
|                | R.2264               | TCCCTCGTCCCTCTATC       |                       |                 |
| <i>SQLE</i>    | F.1005               | GCTGGTGTTCCTGTGCGC      | XM_005688851.3        | 126             |
|                | R.1130               | ATGAAAGGCAAGGCTGA       |                       |                 |
| <i>HMGCS1</i>  | F.725                | GAGGACTTCGTGGGACT       | XM_005694740.3        | 151             |
|                | R.875                | TGGATCTTCTTGCGGTA       |                       |                 |
| <i>ALDH3B1</i> | F.1303               | GCTTCTGTGGGAACGACG      | XM_018042919.1        | 179             |
|                | R.1481               | CGGGTAGCGGATGGTGTA      |                       |                 |
| <i>RPS9</i>    | F.243                | CCTCGACCAAGAGCTGAAG     | XM_018063498.1        | 64              |
|                | R.306                | CCTCCAGACCTCACGTTTGTTTC |                       |                 |
| <i>UXT</i>     | F.391                | CAGCTGGCCAAATACCTTCAA   | XM_005700842.2        | 125             |
|                | R.515                | GTGTCTGGGACCACTGTGTCAA  |                       |                 |

<sup>1</sup>Primer direction (F-forward, R-reverse) and hybridization position on the sequence.

<sup>2</sup>Amplicon size in base pair (bp)

*SCD*, stearoyl-CoA desaturase; *LDLR*, low density lipoprotein receptor; *FASN*, fatty acid synthase; *FADS1*, fatty acid desaturase 1; *FADS2*, fatty acid desaturase 2; *INSIG1*, insulin induced gene 1; *HMGCR*, 3-hydroxy-3-methylglutaryl-CoA reductase; *SQLE*, squalene epoxidase; *HMGCS1*, 3-hydroxy-3-methylglutaryl-CoA synthase 1; *ALDH3B1*, aldehyde dehydrogenase 3 family member B1; *RPS9*, ribosomal protein S9; *UXT*, ubiquitously expressed prefoldin like chaperone.
